# Supplementary material for: Predicting extensive metastasis in postoperative oligometastatic colorectal cancer
Source: Springer Nature journal article supplement (doi:10.1007/s00384-025-04841-w), 2025-02-26
Supplement: MOESM1 [file 384_2025_4841_MOESM1_ESM.pdf]

# 1 Supplementary material

## 2 [Supplementary Table 1: Candidate Risk Factors](#)

| Variable                                                            | Data type           | Annotation                                                                                                                                                                                                                                                                               |
|---------------------------------------------------------------------|---------------------|------------------------------------------------------------------------------------------------------------------------------------------------------------------------------------------------------------------------------------------------------------------------------------------|
| Clinical stage                                                      |                     |                                                                                                                                                                                                                                                                                          |
| T stage                                                             | Categorical         | Reference the American Joint Committee on Cancer (AJCC) eighth edition TNM staging system                                                                                                                                                                                                |
| N stage                                                             | data                |                                                                                                                                                                                                                                                                                          |
| M stage                                                             |                     |                                                                                                                                                                                                                                                                                          |
| Whether postoperative treatment is regular (WPTIS)                  | Categorical<br>data | Patients are categorized into two groups based on whether they adhere to the standard treatment protocol and whether treatment interruptions occur due to treatment reactions, economic status, or other reasons during the treatment process: regular treatment and irregular treatment |
| Postoperative treatment plan (PTP)                                  | Categorical<br>data | Divided into: postoperative follow-up, postoperative adjuvant chemotherapy (including Postoperative adjuvant chemotherapy, Neoadjuvant therapy)                                                                                                                                          |
| Oligometastasis events (OE)                                         | Categorical<br>data | Divided into: intestinal metastasis, hepatic metastasis, pulmonary metastasis, metastasis of other organs (including ovarian, bone, cranial, etc.)                                                                                                                                       |
| Whether surgery has been undertaken following oligometastasis (WST) | Categorical<br>data | Divided into: surgical treatment after oligometastasis, non-surgical treatment after oligometastasis                                                                                                                                                                                     |
| Reason for medical consultation (RMC)                               | Categorical<br>data | Divided into: incidental findings during physical examination, abdominal pain, alterations in bowel movements (constipation, diarrhea, changes in stool consistency and frequency), and bloody stool                                                                                     |
| Tumor sidedness (TS)                                                | Categorical<br>data | Divided into right-sided and left-sided based on the hepatic and splenic regions                                                                                                                                                                                                         |
| The number of cancerous nodules (NCN)                               | Categorical<br>data | Divided into: detected cancer nodules, no cancer nodules detected                                                                                                                                                                                                                        |
| Whether the pathology indicates mucinous adenocarcinoma (WPMA)      | Categorical<br>data | Divided into: mucinous adenocarcinoma, non-mucinous adenocarcinoma                                                                                                                                                                                                                       |
| Histological type (HT)                                              | Categorical<br>data | According to the WHO histological classification of tumors (2019 edition), it is divided into: poorly differentiated adenocarcinoma , Moderately to well-differentiated adenocarcinoma (including moderately differentiated adenocarcinoma and well-differentiated adenocarcinoma)       |
| Whether the tumor exhibits vascular invasion                        | Categorical<br>data | According to postoperative pathology, it is divided into: vascular invasion, no vascular invasion detected                                                                                                                                                                               |
| Whether the tumor exhibits neural invasion                          | Categorical<br>data | According to postoperative pathology, it is divided into: neural invasion, no neural invasion detected                                                                                                                                                                                   |
| Number of oligometastatic lesions                                   | Categorical<br>data | According to whether the metastatic lesions are more than one, it is divided into single lesions and multiple lesions                                                                                                                                                                    |

|                                                          |                     |                                                                                                                                                                                                                                                  |
|----------------------------------------------------------|---------------------|--------------------------------------------------------------------------------------------------------------------------------------------------------------------------------------------------------------------------------------------------|
| Timing of metastasis<br>(TM)                             | Categorical<br>data | Metastases are classified into synchronous and metachronous metastases. Synchronous metastasis is defined as the detection of metastatic tumors at the time of primary tumor diagnosis or within six months thereafter                           |
| Maximum diameter of<br>oligometastatic lesions<br>(MDOL) | Continuous<br>data  | Measure via imaging system and select the maximum diameter of the largest metastatic lesion. Units are in mm                                                                                                                                     |
| Age                                                      | Continuous<br>data  | Biological age at the diagnosis of colorectal cancer                                                                                                                                                                                             |
| Total number of detected<br>lymph nodes (TNDLN)          | Count data          | Based on postoperative pathological data obtained, processed as continuous data                                                                                                                                                                  |
| Number of positive<br>lymph nodes (NPLN)                 |                     |                                                                                                                                                                                                                                                  |
| Cancer antigen 50<br>(CA50)                              | Continuous<br>data  | Data were collected at six time points: preoperative, postoperative, after the first postoperative treatment, at the time of oligometastasis, after oligometastasis treatment, and at last follow-up                                             |
| Cancer antigen 125<br>(CA125)                            | Continuous<br>data  | Data were collected at six time points: preoperative, postoperative, after the first postoperative treatment, at the time of oligometastasis, after oligometastasis treatment, and at last follow-up                                             |
| Carcinoembryonic<br>antigen (CEA)                        | Continuous<br>data  | Data were collected at six time points: preoperative, postoperative, after the first postoperative treatment, at the time of oligometastasis, after oligometastasis treatment, and at last follow-up                                             |
| Cancer antigen 199<br>(CA199)                            | Continuous<br>data  | Data were collected at six time points: preoperative, postoperative, after the first postoperative treatment, at the time of oligometastasis, after oligometastasis treatment, and at last follow-up                                             |
| Red blood cell count<br>(RBC)                            | Count data          | Data were collected at six time points: preoperative, postoperative, after the first postoperative treatment, at the time of oligometastasis, after oligometastasis treatment, and at last follow-up                                             |
| Platelet to lymphocyte<br>ratio (PLR)                    | Continuous<br>data  | Platelet count/lymphocyte count (PLT/LY). Data were collected at six time points: preoperative, postoperative, after the first postoperative treatment, at the time of oligometastasis, after oligometastasis treatment, and at last follow-up   |
| Lymphocyte to monocyte<br>ratio (LMR)                    | Continuous<br>data  | Lymphocyte count/monocyte count (LY/MC). Data were collected at six time points: preoperative, postoperative, after the first postoperative treatment, at the time of oligometastasis, after oligometastasis treatment, and at last follow-up    |
| Lymphocyte to albumin<br>product (LA)                    | Continuous<br>data  | Lymphocyte count * serum albumin (LY*Alb). Data were collected at six time points: preoperative, postoperative, after the first postoperative treatment, at the time of oligometastasis, after oligometastasis treatment, and at last follow-up  |
| Albumin to globulin ratio<br>(AGR)                       | Continuous<br>data  | Serum albumin/serum globulin (Alb/Glob). Data were collected at six time points: preoperative, postoperative, after the first postoperative treatment, at the time of oligometastasis, after oligometastasis treatment, and at last follow-up    |
| C-reactive protein to<br>serum albumin ratio<br>(CAR)    | Continuous<br>data  | C-reactive protein/serum albumin (CRP/Alb). Data were collected at six time points: preoperative, postoperative, after the first postoperative treatment, at the time of oligometastasis, after oligometastasis treatment, and at last follow-up |

4 [Supplementary Table 2: omparison of Data Before and After Imputation](#)

|                                     | Imputed<br>data | Original<br>data | Methods for inter-group<br>comparison | P-value |
|-------------------------------------|-----------------|------------------|---------------------------------------|---------|
| Total                               | 214             | 214              |                                       |         |
| Age<br>median(IQR)                  | 62 (55,69)      | 62 (55,69)       | Ranksum test                          | 1       |
| Gender                              |                 |                  | Chisq. (1 df) = 0                     | 0.97    |
| Male                                | 127 (59.3)      | 126 (59.2)       |                                       |         |
| Female                              | 87 (40.7)       | 87 (40.8)        |                                       |         |
| Clinical stage                      |                 |                  | Chisq. (3 df) = 0.01                  | 1       |
| 1                                   | 5 (2.3)         | 5 (2.4)          |                                       |         |
| 2                                   | 35 (16.4)       | 34 (16)          |                                       |         |
| 3                                   | 59 (27.6)       | 58 (27.4)        |                                       |         |
| 4                                   | 115 (53.7)      | 115 (54.2)       |                                       |         |
| T-stage                             |                 |                  | Fisher's exact test                   | 1       |
| 1                                   | 5 (2.3)         | 4 (1.9)          |                                       |         |
| 2                                   | 17 (7.9)        | 16 (7.8)         |                                       |         |
| 3                                   | 85 (39.7)       | 83 (40.3)        |                                       |         |
| 4                                   | 107 (50)        | 103 (50)         |                                       |         |
| N-stage                             |                 |                  | Chisq. (2 df) = 0.04                  | 0.98    |
| 0                                   | 74 (34.6)       | 72 (34.8)        |                                       |         |
| 1                                   | 103 (48.1)      | 98 (47.3)        |                                       |         |
| 2                                   | 37 (17.3)       | 37 (17.9)        |                                       |         |
| M-stage                             |                 |                  | Chisq. (1 df) = 0                     | 1       |
| 0                                   | 99 (46.3)       | 99 (46.3)        |                                       |         |
| 1                                   | 115 (53.7)      | 115 (53.7)       |                                       |         |
| WPTIS                               |                 |                  | Chisq. (1 df) = 0.18                  | 0.67    |
| Irregular treatment                 | 25 (11.7)       | 25 (13.1)        |                                       |         |
| Regular treatment                   | 189 (88.3)      | 166 (86.9)       |                                       |         |
| PTP                                 |                 |                  | Chisq. (2 df) = 0.01                  | 0.10    |
| Postoperative follow-up             | 22 (10.3)       | 22 (10.3)        |                                       |         |
| Postoperative adjuvant chemotherapy | 154 (72)        | 154 (72.3)       |                                       |         |
| Neoadjuvant therapy                 | 38 (17.8)       | 37 (17.4)        |                                       |         |

|                                                    | Imputed<br>data | Original<br>data | Methods for inter-group<br>comparison | P-value |
|----------------------------------------------------|-----------------|------------------|---------------------------------------|---------|
| OE                                                 |                 |                  | Chisq. (3 df) = 0                     | 1       |
| Intestinal metastasis                              | 18 (8.4)        | 18 (8.4)         |                                       |         |
| Hepatic metastasis                                 | 137 (64)        | 137 (64)         |                                       |         |
| Pulmonary metastasis                               | 50 (23.4)       | 50 (23.4)        |                                       |         |
| Metastasis of other organs                         | 9 (4.2)         | 9 (4.2)          |                                       |         |
| WST                                                |                 |                  | Chisq. (1 df) = 0                     | 1       |
| Non-surgical treatment                             | 123 (57.5)      | 123 (57.5)       |                                       |         |
| Surgical treatment                                 | 91 (42.5)       | 91 (42.5)        |                                       |         |
| RMC                                                |                 |                  | Chisq. (3 df) = 0.24                  | 0.97    |
| Incidental findings during physical<br>examination | 25 (11.7)       | 24 (12.1)        |                                       |         |
| Abdominal pain                                     | 51 (23.8)       | 49 (24.7)        |                                       |         |
| Alterations in bowel movements                     | 53 (24.8)       | 45 (22.7)        |                                       |         |
| Bloody stool                                       | 85 (39.7)       | 80 (40.4)        |                                       |         |
| TS                                                 |                 |                  | Chisq. (1 df) = 0                     | 0.97    |
| Right-sided                                        | 70 (32.7)       | 70 (32.9)        |                                       |         |
| Left-sided                                         | 144 (67.3)      | 143 (67.1)       |                                       |         |
| NCN                                                |                 |                  | Chisq. (1 df) = 0.09                  | 0.76    |
| No cancer nodules detected                         | 159 (74.3)      | 146 (73)         |                                       |         |
| Detected cancer nodules                            | 55 (25.7)       | 54 (27)          |                                       |         |
| WPMA                                               |                 |                  | Chisq. (1 df) = 0.01                  | 0.91    |
| Non-mucinous adenocarcinoma                        | 193 (90.2)      | 186 (89.9)       |                                       |         |
| Mucinous adenocarcinoma                            | 21 (9.8)        | 21 (10.1)        |                                       |         |
| HT                                                 |                 |                  | Fisher's exact test                   | 0.97    |
| Poorly differentiated adenocarcinoma               | 32 (15)         | 32 (15.8)        |                                       |         |
| Moderately differentiated<br>adenocarcinoma        | 178 (83.2)      | 166 (82.2)       |                                       |         |
| Well-differentiated adenocarcinoma                 | 4 (1.9)         | 4 (2)            |                                       |         |
| WVI                                                |                 |                  | Chisq. (1 df) = 0                     | 0.99    |
| No vascular invasion detected                      | 147 (68.7)      | 138 (68.7)       |                                       |         |
| vascular invasion                                  | 67 (31.3)       | 63 (31.3)        |                                       |         |
| WNI                                                |                 |                  | Chisq. (1 df) = 0.01                  | 0.91    |
| No neural invasion detected                        | 166 (77.6)      | 155 (77.1)       |                                       |         |
| Neural invasion                                    | 48 (22.4)       | 46 (22.9)        |                                       |         |

|                  | Imputed<br>data  | Original<br>data | Methods for inter-group<br>comparison | P-value |
|------------------|------------------|------------------|---------------------------------------|---------|
| NOL              |                  |                  | Chisq. (1 df) = 0                     | 0.99    |
| Single lesions   | 70 (32.7)        | 66 (32.7)        |                                       |         |
| Multiple lesions | 144 (67.3)       | 136 (67.3)       |                                       |         |
| DFS              |                  |                  | Ranksum test                          | 1       |
| median(IQR)      | 0 (0,16)         | 0 (0,16)         |                                       |         |
| EFS              |                  |                  | Ranksum test                          | 1       |
| median(IQR)      | 26<br>(14.2,39)  | 26<br>(14.2,39)  |                                       |         |
| TNDLN            |                  |                  | Ranksum test                          | 0.68    |
| median(IQR)      | 13 (9,18)        | 13 (9,18)        |                                       |         |
| NPLN             |                  |                  | Ranksum test                          | 0.97    |
| median(IQR)      | 1 (0,3)          | 1 (0,2)          |                                       |         |
| Preop-CEA        |                  |                  | Ranksum test                          | 0.51    |
| median(IQR)      | 2.1<br>(1.5,3.2) | 2.2<br>(1.7,2.9) |                                       |         |
| Preop-CA199      |                  |                  | Ranksum test                          | 0.73    |
| median(IQR)      | 2.9<br>(1.9,4.4) | 2.9<br>(2.4,3.6) |                                       |         |
| Preop-Glob       |                  |                  | Ranksum test                          | 0.05    |
| median(IQR)      | 3.4<br>(3.3,3.5) | 3.3<br>(3.2,3.4) |                                       |         |
| Preop-Alb        |                  |                  | Ranksum test                          | 0.709   |
| median(IQR)      | 3.8<br>(3.7,3.8) | 3.8<br>(3.7,3.8) |                                       |         |
| Preop-RBC        |                  |                  | Ranksum test                          | 0.11    |
| median(IQR)      | 1.9<br>(1.8,1.9) | 1.8<br>(1.8,1.9) |                                       |         |
| Preop-PLT        |                  |                  | Ranksum test                          | 0.49    |
| median(IQR)      | 5.4<br>(5.2,5.8) | 5.4<br>(5.2,5.6) |                                       |         |

|              | Imputed<br>data  | Original<br>data | Methods for inter-group<br>comparison | P-value |
|--------------|------------------|------------------|---------------------------------------|---------|
| Preop-LY     |                  |                  | Ranksum test                          | 0.45    |
| median(IQR)  | 1.3<br>(1.1,1.4) | 1.2<br>(1.1,1.4) |                                       |         |
| Preop-MC     |                  |                  | Ranksum test                          | 0.44    |
| median(IQR)  | 0.9 (0.8,1)      | 0.9<br>(0.8,0.9) |                                       |         |
| Preop-CRP    |                  |                  | Ranksum test                          | 0.66    |
| median(IQR)  | 2.1<br>(1.9,2.7) | 2.1 (2,2.2)      |                                       |         |
| Postop-CEA   |                  |                  | Ranksum test                          | 0.52    |
| median(IQR)  | 1.6<br>(1.1,2.7) | 1.6<br>(1.3,2.2) |                                       |         |
| Postop-CA199 |                  |                  | Ranksum test                          | 0.44    |
| median(IQR)  | 2.8<br>(2.2,4.1) | 2.7<br>(2.3,3.4) |                                       |         |
| Postop-Glob  |                  |                  | Ranksum test                          | 0.87    |
| median(IQR)  | 3.4<br>(3.2,3.6) | 3.4<br>(3.3,3.5) |                                       |         |
| Postop-Alb   |                  |                  | Ranksum test                          | 0.61    |
| median(IQR)  | 3.8<br>(3.7,3.9) | 3.8<br>(3.7,3.8) |                                       |         |
| Postop-RBC   |                  |                  | Ranksum test                          | 0.19    |
| median(IQR)  | 1.8<br>(1.8,1.9) | 1.8<br>(1.8,1.9) |                                       |         |
| Postop-PLT   |                  |                  | Ranksum test                          | 0.57    |
| median(IQR)  | 5.3<br>(5.1,5.6) | 5.3<br>(5.1,5.6) |                                       |         |
| Postop-LY    |                  |                  | Ranksum test                          | 0.77    |
| median(IQR)  | 1.2<br>(1.1,1.4) | 1.2<br>(1.1,1.3) |                                       |         |

|                           | Imputed<br>data  | Original<br>data | Methods for inter-group<br>comparison | P-value |
|---------------------------|------------------|------------------|---------------------------------------|---------|
| Postop-MC                 |                  |                  | Ranksum test                          | 0.07    |
| median(IQR)               | 0.9<br>(0.8,0.9) | 0.9<br>(0.8,0.9) |                                       |         |
| Postop-CRP                |                  |                  | Ranksum test                          | 0.36    |
| median(IQR)               | 2.1 (2,3)        | 2.1 (2,2.3)      |                                       |         |
| CEA after 1st Postop-Tx   |                  |                  | Ranksum test                          | 0.67    |
| median(IQR)               | 1.7<br>(1.3,3.2) | 1.7<br>(1.4,2.3) |                                       |         |
| CA199 after 1st Postop-Tx |                  |                  | Ranksum test                          | 0.29    |
| median(IQR)               | 3 (2.2,4)        | 2.8<br>(2.3,3.4) |                                       |         |
| Alb after 1st Postop-Tx   |                  |                  | Ranksum test                          | 0.57    |
| median(IQR)               | 3.8<br>(3.7,3.9) | 3.8<br>(3.7,3.9) |                                       |         |
| RBC after 1st Postop-Tx   |                  |                  | Ranksum test                          | 0.69    |
| median(IQR)               | 1.8<br>(1.7,1.9) | 1.8<br>(1.8,1.9) |                                       |         |
| PLT after 1st Postop-Tx   |                  |                  | Ranksum test                          | 0.30    |
| median(IQR)               | 5.1<br>(4.9,5.4) | 5.2 (5,5.4)      |                                       |         |
| LY after 1st Postop-Tx    |                  |                  | Ranksum test                          | 0.85    |
| median(IQR)               | 1.2<br>(1.1,1.4) | 1.2<br>(1.1,1.3) |                                       |         |
| MC after 1st Postop-Tx    |                  |                  | Ranksum test                          | 0.81    |
| median(IQR)               | 0.9<br>(0.8,0.9) | 0.9<br>(0.8,0.9) |                                       |         |
| MDOL                      |                  |                  | Ranksum test                          | 0.81    |
| median(IQR)               | 3 (2.5,3.7)      | 3 (2.5,3.6)      |                                       |         |
| CEA at Oligo              |                  |                  | Ranksum test                          | 0.69    |

|                      | Imputed<br>data  | Original<br>data | Methods for inter-group<br>comparison | P-value |
|----------------------|------------------|------------------|---------------------------------------|---------|
| CEA at Oligo         |                  |                  | Ranksum test                          | 0.69    |
| median(IQR)          | 1.9<br>(1.5,3.1) | 1.9<br>(1.5,2.7) |                                       |         |
| CA199 at Oligo       |                  |                  | Ranksum test                          | 0.38    |
| median(IQR)          | 3 (2.3,4.2)      | 2.9<br>(2.4,3.5) |                                       |         |
| Glob at Oligo        |                  |                  | Ranksum test                          | 0.44    |
| median(IQR)          | 3.4<br>(3.3,3.6) | 3.4<br>(3.3,3.5) |                                       |         |
| Alb at Oligo         |                  |                  | Ranksum test                          | 0.71    |
| median(IQR)          | 3.8<br>(3.7,3.9) | 3.8<br>(3.8,3.9) |                                       |         |
| RBC at Oligo         |                  |                  | Ranksum test                          | 0.30    |
| median(IQR)          | 1.8<br>(1.8,1.9) | 1.9<br>(1.8,1.9) |                                       |         |
| PLT at Oligo         |                  |                  | Ranksum test                          | 0.40    |
| median(IQR)          | 5.2<br>(4.9,5.4) | 5.2<br>(4.9,5.4) |                                       |         |
| LY at Oligo          |                  |                  | Ranksum test                          | 0.70    |
| median(IQR)          | 1.2<br>(1.1,1.4) | 1.2<br>(1.1,1.4) |                                       |         |
| MC at Oligo          |                  |                  | Ranksum test                          | 0.65    |
| median(IQR)          | 0.9<br>(0.8,0.9) | 0.9<br>(0.8,0.9) |                                       |         |
| CRP at Oligo         |                  |                  | Ranksum test                          | 0.74    |
| median(IQR)          | 2 (2,2.2)        | 2 (2,2.1)        |                                       |         |
| CEA after Oligo-Tx   |                  |                  | Ranksum test                          | 0.37    |
| median(IQR)          | 1.7<br>(1.3,2.4) | 1.7<br>(1.4,2.5) |                                       |         |
| CA199 after Oligo-Tx |                  |                  | Ranksum test                          | 0.45    |
| median(IQR)          | 2.7<br>(2.2,3.3) | 2.8<br>(2.3,3.3) |                                       |         |



|                     | Imputed<br>data  | Original<br>data | Methods for inter-group<br>comparison | P-value |
|---------------------|------------------|------------------|---------------------------------------|---------|
| Glob after Oligo-Tx |                  |                  | Ranksum test                          | 0.26    |
| median(IQR)         | 3.4<br>(3.3,3.5) | 3.4<br>(3.3,3.5) |                                       |         |
| Alb after Oligo-Tx  |                  |                  | Ranksum test                          | 0.36    |
| median(IQR)         | 3.8<br>(3.7,3.9) | 3.8<br>(3.7,3.9) |                                       |         |
| RBC after Oligo-Tx  |                  |                  | Ranksum test                          | 0.61    |
| median(IQR)         | 1.8<br>(1.8,1.9) | 1.8<br>(1.8,1.9) |                                       |         |
| PLT after Oligo-Tx  |                  |                  | Ranksum test                          | 0.82    |
| median(IQR)         | 5.2<br>(4.9,5.4) | 5.2<br>(4.9,5.4) |                                       |         |
| LY after Oligo-Tx   |                  |                  | t-test (198 df) = 0.02                | 0.99    |
| mean(SD)            | 1.2 (0.2)        | 1.2 (0.2)        |                                       |         |
| MC after Oligo-Tx   |                  |                  | Ranksum test                          | 0.43    |
| median(IQR)         | 0.9<br>(0.8,0.9) | 0.9<br>(0.8,0.9) |                                       |         |
| CRP after Oligo-Tx  |                  |                  | Ranksum test                          | 0.93    |
| median(IQR)         | 2 (2,2.2)        | 2.1 (2,2.2)      |                                       |         |
| CA50 at LFU         |                  |                  | Ranksum test                          | 0.49    |
| median(IQR)         | 3.2<br>(1.9,4.6) | 3 (2.1,4)        |                                       |         |
| CA125 at LFU        |                  |                  | Ranksum test                          | 0.78    |
| median(IQR)         | 2.7<br>(2.3,3.6) | 2.7<br>(2.4,3.3) |                                       |         |
| CEA at LFU          |                  |                  | Ranksum test                          | 0.10    |
| median(IQR)         | 2.5<br>(1.6,4.5) | 2.5<br>(1.6,4.5) |                                       |         |
| CA199 at LFU        |                  |                  | Ranksum test                          | 0.89    |
| median(IQR)         | 3.3<br>(2.5,4.5) | 3.3<br>(2.5,4.6) |                                       |         |

|             | Imputed<br>data  | Original<br>data | Methods for inter-group<br>comparison | P-value |
|-------------|------------------|------------------|---------------------------------------|---------|
| Glob at LFU |                  |                  | Ranksum test                          | 0.88    |
| median(IQR) | 3.4<br>(3.3,3.5) | 3.4<br>(3.3,3.5) |                                       |         |
| Alb at LFU  |                  |                  | Ranksum test                          | 0.65    |
| median(IQR) | 3.8<br>(3.7,3.9) | 3.8<br>(3.7,3.9) |                                       |         |
| RBC at LFU  |                  |                  | Ranksum test                          | 0.82    |
| median(IQR) | 1.8<br>(1.7,1.9) | 1.8<br>(1.7,1.9) |                                       |         |
| PLT at LFU  |                  |                  | Ranksum test                          | 0.97    |
| median(IQR) | 5.2 (5,5.4)      | 5.2 (5,5.4)      |                                       |         |
| LY at LFU   |                  |                  | Ranksum test                          | 0.91    |
| median(IQR) | 1.2 (1,1.3)      | 1.2 (1,1.3)      |                                       |         |
| MC at LFU   |                  |                  | Ranksum test                          | 0.86    |
| median(IQR) | 0.9<br>(0.8,0.9) | 0.9<br>(0.8,0.9) |                                       |         |
| CRP at LFU  |                  |                  | Ranksum test                          | 0.93    |
| median(IQR) | 2.1 (2,3)        | 2.1 (2,3)        |                                       |         |

5 IQR:Interquartile range

6 [Supplementary Table 3 Proportional Hazards Assumption Test](#)

| Variable                  | P-value |
|---------------------------|---------|
| Clinical stage            | 0.07    |
| OE                        | 0.11    |
| WST                       | 0.81    |
| NCN                       | 0.79    |
| HT                        | 0.12    |
| NPLN                      | 0.47    |
| Preop-PLR                 | 0.86    |
| Preop-LA                  | 0.66    |
| Preop-AGR                 | 0.27    |
| Postop-CEA                | 0.11    |
| CEA after 1st Postop-Tx   | 0.18    |
| CA199 after 1st Postop-Tx | 0.33    |
| CEA at Oligo              | 0.61    |
| CEA after Oligo-Tx        | 0.62    |
| CA50 at LFU               | 0.61    |

| <b>Variable</b> | <b>P-value</b> |
|-----------------|----------------|
| CEA at LFU      | 0.06           |
| GLOBAL          | 0.12           |

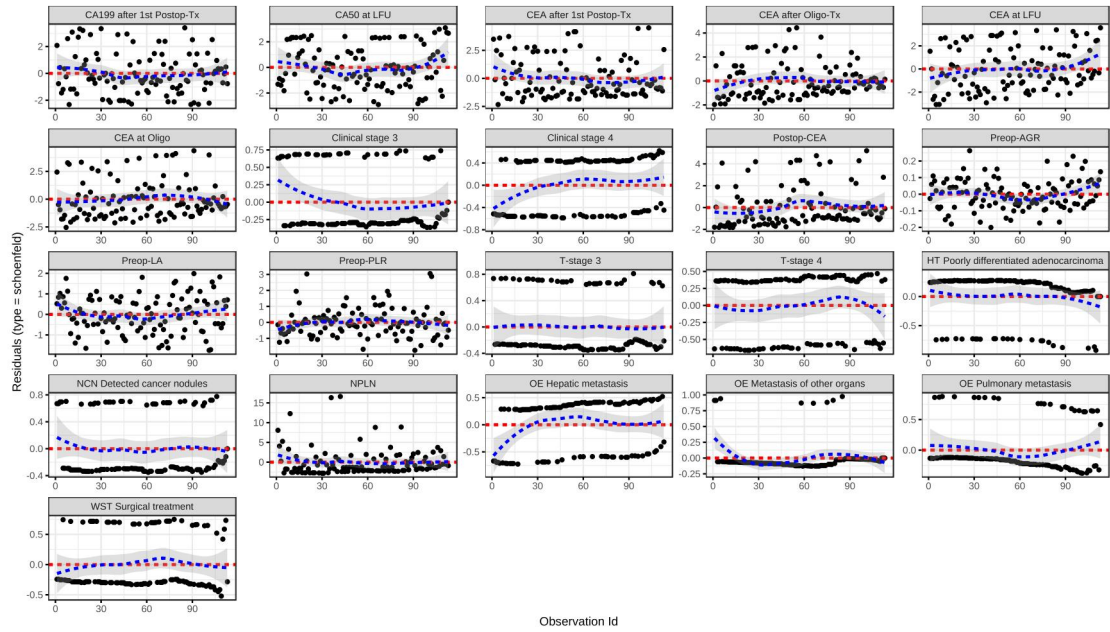

8

9 **Supplementary Figure 1 Schoenfeld Residual Plot for Proportional Hazards Assumption Testing**

10

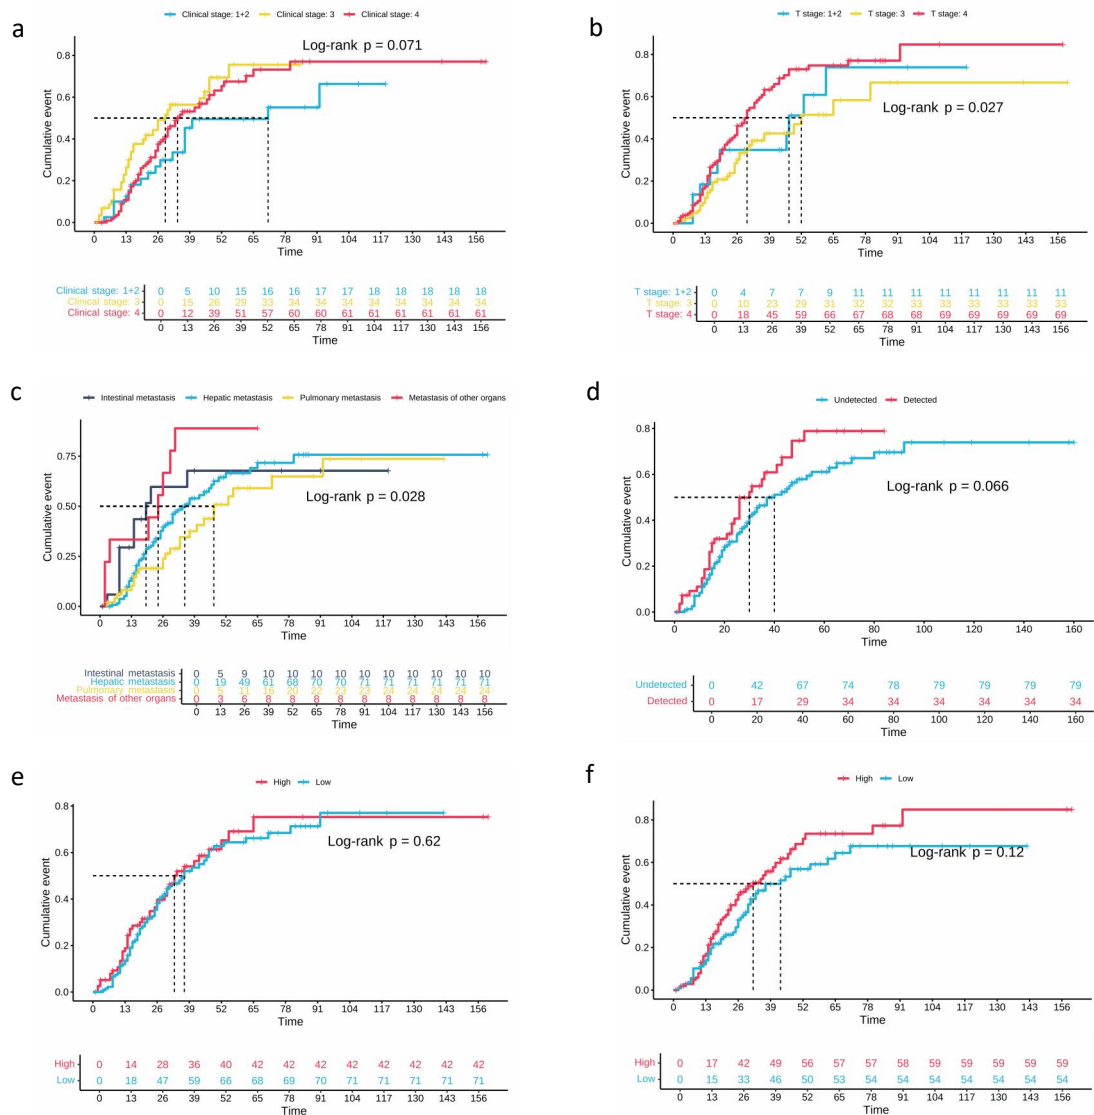

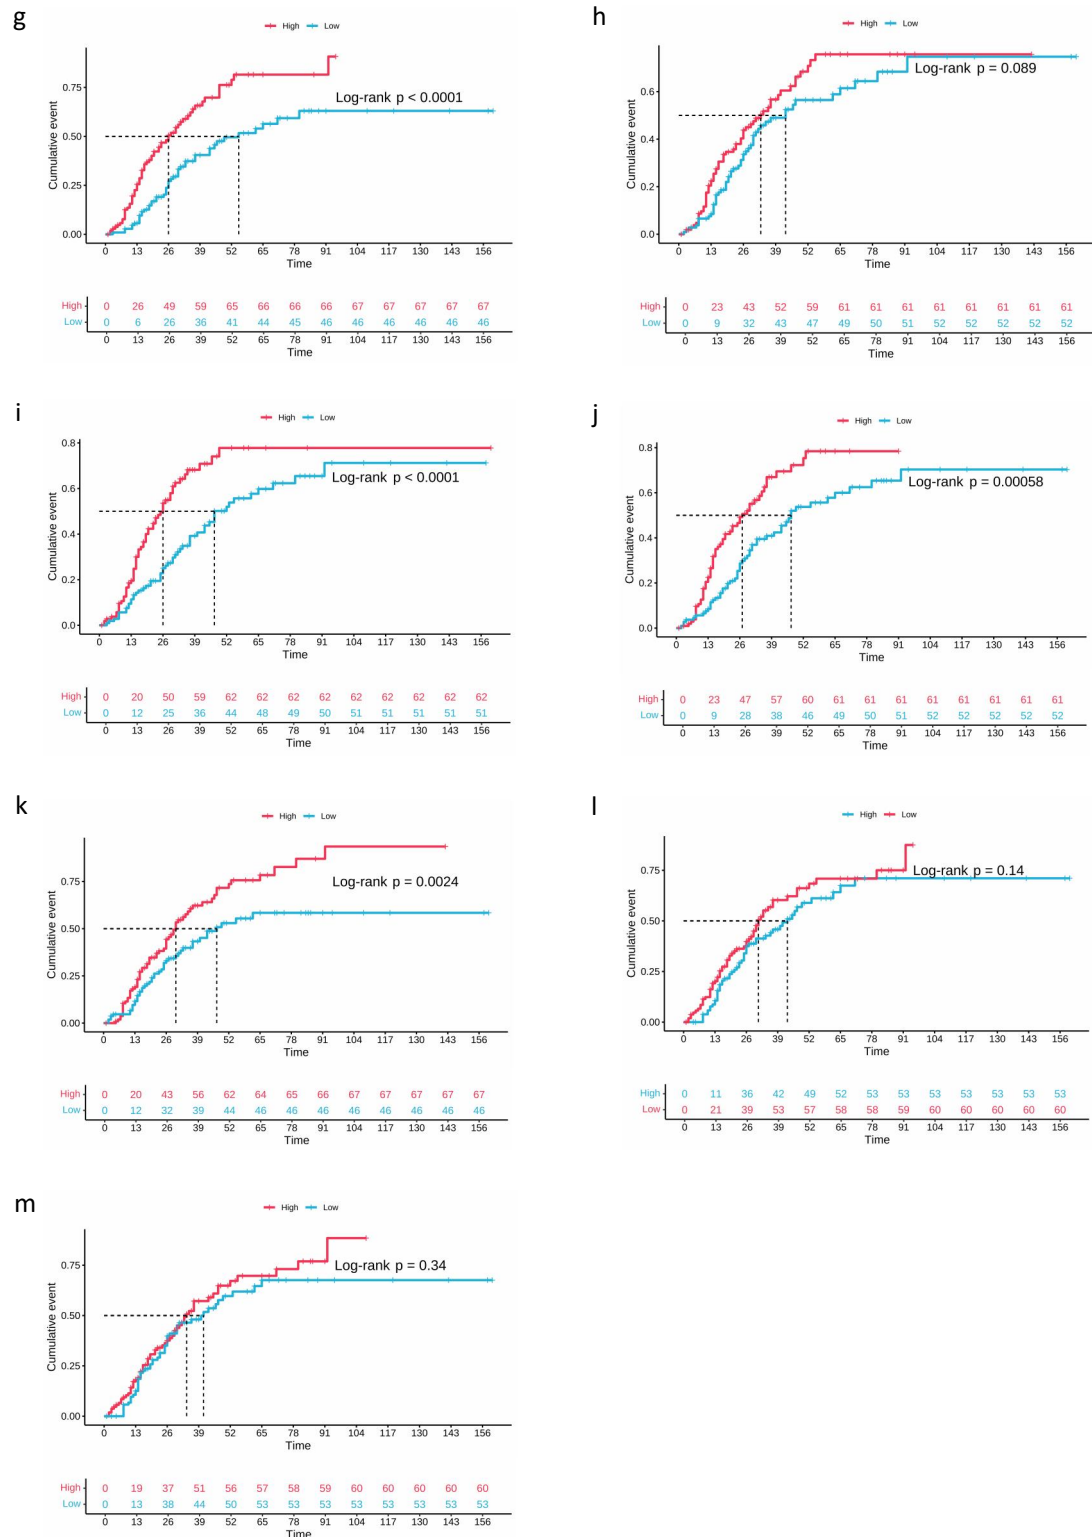

Supplementary Figure 2: (a) KM curve for patients grouped by clinical stage; (b) KM curve for patients grouped by T stage; (c) KM curve for patients grouped by OE; (d) KM curve for patients grouped by NCN; (e) KM curve for patients grouped by NPLN; (f) KM curve for patients grouped by median Postop-CEA; (g) KM curve for patients grouped by median CEA after 1st Postop-Tx; (h) KM curve for patients grouped by median CA199 after 1st Postop-Tx; (i) KM curve for patients grouped by median CEA at Oligo; (j) KM curve for patients grouped by median CEA after Oligo-Tx; (k) KM curve for patients grouped by median CA50 at LFU; (l) KM curve for

54 patients grouped by median Preop-PLR; (m) KM curve for patients grouped by median Preop-LA.

55

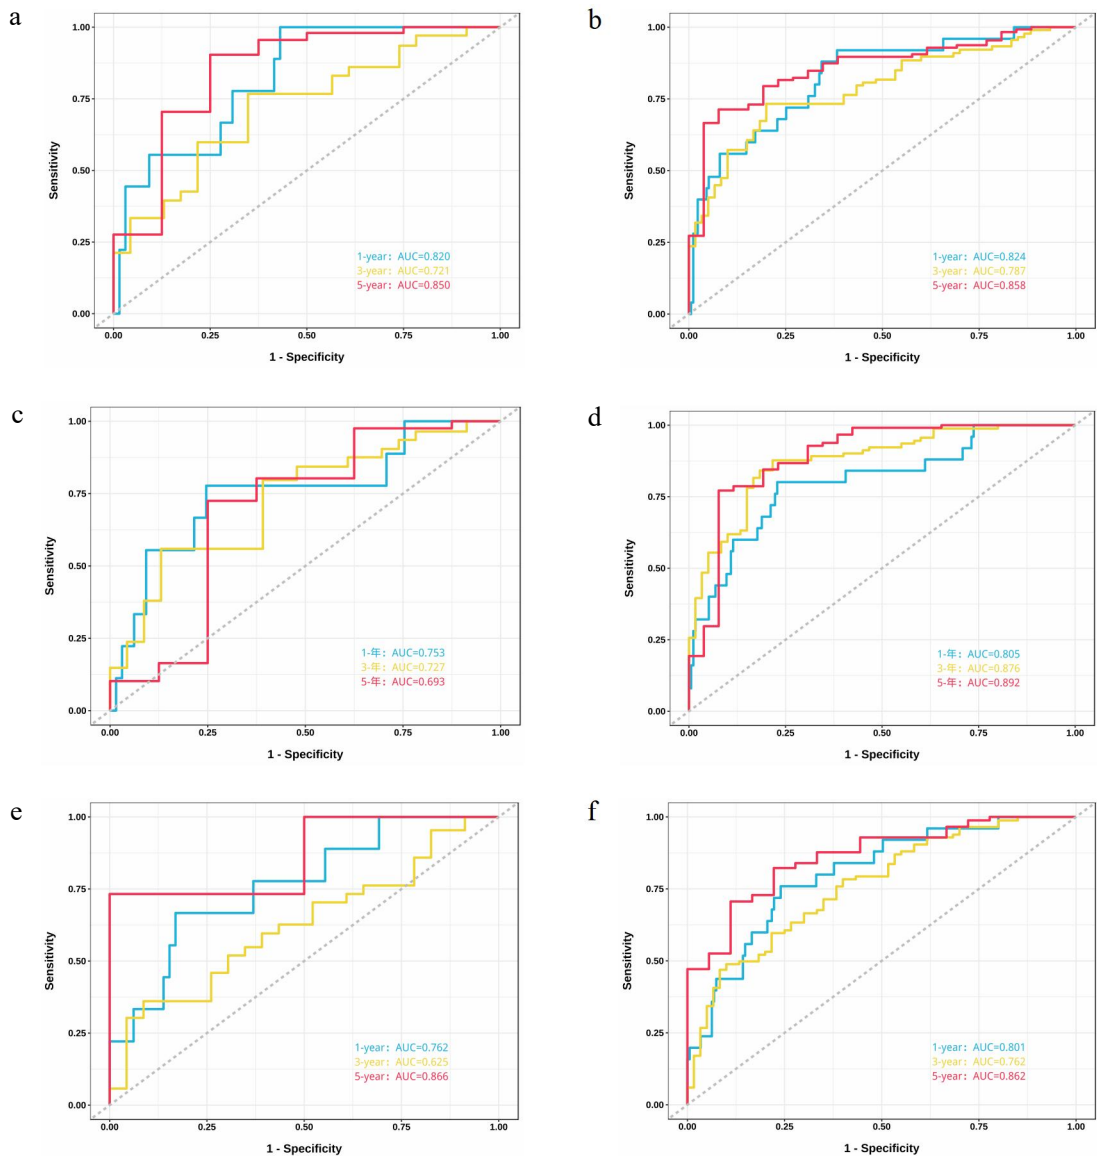

56 Supplementary Figure 3: (a) ROC curves for the COX model at 1, 3, and 5 years in the testing cohort; (b) ROC  
57 curves for the COX model at 1, 3, and 5 years in the ALL cohort; (c) ROC curves for the XGBoost model at 1, 3,  
58 and 5 years in the testing cohort; (d) ROC curves for the XGBoost model at 1, 3, and 5 years in the ALL cohort; (e)  
59 ROC curves for the SurvSVM model at 1, 3, and 5 years in the testing cohort; (f) ROC curves for the SurvSVM  
60 model at 1, 3, and 5 years in the ALL cohort.

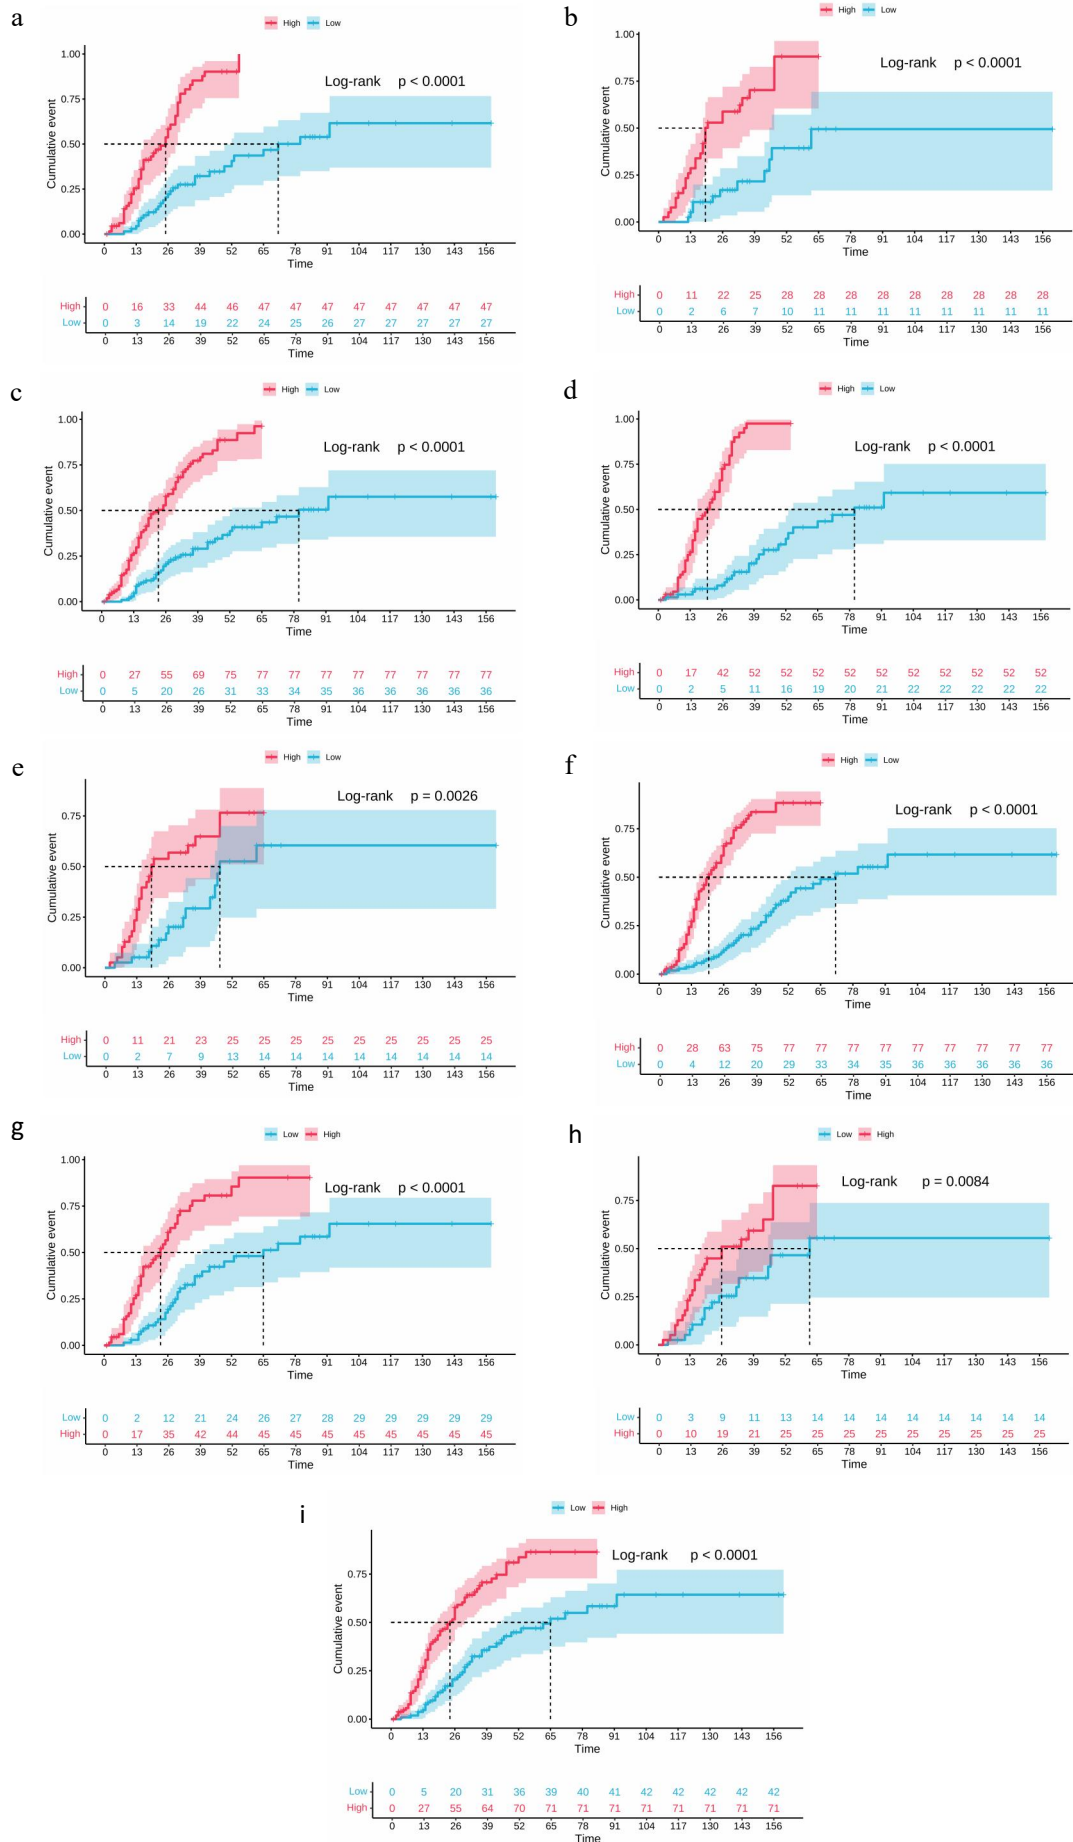

61 Supplementary Figure 4: (a) KM curves for patients grouped by the COX model in the training cohort; (b) KM

curves for patients grouped by the COX model in the testing cohort; (c) KM curves for patients grouped by the COX model in the ALL cohort; (d) KM curves for patients grouped by the XGBoost model in the training cohort; (e) KM curves for patients grouped by the XGBoost model in the testing cohort; (f) KM curves for patients grouped by the XGBoost model in the ALL cohort; (g) KM curves for patients grouped by the SurvSVM model in the training cohort; (h) KM curves for patients grouped by the SurvSVM model in the testing cohort; (i) KM curves for patients grouped by the SurvSVM model in the ALL cohort.

68
